# Supplementary material
Source: publisher figshare collection journal article supplement (https://diabetesjournals.figshare.com/articles/dataset/_/14974818)
Supplement: Supplementary file 1 [file 1]

**Supplemental Table 1.** Clinical and health care characteristics at the SEARCH follow-up visits among the longitudinal subset only (n=649 Type 1, n=84 Type 2).

|                                                     | Type 1     |               |           | Type 2    |               |           |
|-----------------------------------------------------|------------|---------------|-----------|-----------|---------------|-----------|
|                                                     | n          | count or mean | (% or SD) | n         | count or mean | (% or SD) |
| <b>First follow-up</b>                              | <b>649</b> |               |           | <b>84</b> |               |           |
| Diabetes provider is endocrinologist                | 649        | 494           | (76%)     | 84        | 35            | (42%)     |
| Cost of care is not a problem                       | 649        | 325           | (50%)     | 84        | 42            | (50%)     |
| Type of insurance                                   | 649        |               |           | 84        |               |           |
| Private                                             |            | 471           | (73%)     |           | 34            | (40%)     |
| Medicare/Medicaid                                   |            | 129           | (20%)     |           | 26            | (31%)     |
| Other                                               |            | 34            | (5%)      |           | 4             | (5%)      |
| None                                                |            | 15            | (2%)      |           | 20            | (24%)     |
| Continuous insurance for past year                  | 649        | 609           | (94%)     | 84        | 57            | (68%)     |
| Has a personal doctor                               | 649        | 523           | (81%)     | 84        | 42            | (50%)     |
| Received diabetes education in past year            | 649        | 457           | (70%)     | 84        | 48            | (57%)     |
| Type 1 diabetes treatment                           | 649        |               |           |           |               |           |
| Insulin pump                                        |            | 372           | (57%)     |           |               |           |
| Other insulin                                       |            | 277           | (43%)     |           |               |           |
| Type 2 diabetes treatment                           |            |               |           | 84        |               |           |
| Insulin (any administration)                        |            |               |           |           | 44            | (52%)     |
| Non-insulin medications only                        |            |               |           |           | 24            | (29%)     |
| No medications                                      |            |               |           |           | 16            | (19%)     |
| Glucose monitoring                                  | 649        |               |           | 84        |               |           |
| <4 times/day (including none)                       |            | 204           | (31%)     |           | 62            | (74%)     |
| ≥4 times/day (including continuous monitoring)      |            | 445           | (69%)     |           | 22            | (26%)     |
| No severe hypoglycemic episodes in past 6 months    | 649        | 597           | (92%)     | 84        | 83            | (99%)     |
| Reported HbA1c tests in past year                   | 649        |               |           | 84        |               |           |
| 0                                                   |            | 14            | (2%)      |           | 15            | (18%)     |
| 1                                                   |            | 88            | (14%)     |           | 19            | (23%)     |
| 2                                                   |            | 153           | (24%)     |           | 27            | (32%)     |
| 3 or more                                           |            | 394           | (61%)     |           | 23            | (27%)     |
| HbA1c (%)                                           | 637        | 9.1           | (1.9)     | 83        | 8.8           | (2.8)     |
| HbA1c (mmol/mol)                                    | 637        | 75.9          | (20.4)    | 83        | 73.1          | (30.7)    |
| Optimal HbA1c (<7% [53 mmol/mol])                   | 637        | 64            | (10%)     | 83        | 31            | (37%)     |
| Warrants quarterly HbA1c testing*                   | 637        | 573           | (90%)     | 83        | 56            | (67%)     |
| Any microvascular complication                      | 648        | 93            | (14%)     | 84        | 33            | (39%)     |
| Diabetic kidney disease                             | 573        | 37            | (6%)      | 71        | 12            | (17%)     |
| Peripheral neuropathy                               | 640        | 39            | (6%)      | 83        | 20            | (24%)     |
| Diabetic retinopathy                                | 634        | 25            | (4%)      | 84        | 10            | (12%)     |
| <b>Second follow-up (longitudinal sub-sample)</b>   | <b>649</b> |               |           | <b>84</b> |               |           |
| Diabetes provider is endocrinologist at both visits | 649        | 425           | (65%)     | 84        | 22            | (26%)     |
| Cost of care is not a problem at both visits        | 649        | 188           | (29%)     | 84        | 25            | (30%)     |
| Type of insurance the same at both visits           | 649        | 477           | (73%)     | 84        | 51            | (61%)     |
| Continuous insurance in past year at both visits    | 649        | 576           | (89%)     | 84        | 54            | (64%)     |
| Has a personal doctor at both visits†               | 649        | 433           | (67%)     | 84        | 27            | (32%)     |

|                                                                                  |     |             |    |             |
|----------------------------------------------------------------------------------|-----|-------------|----|-------------|
| Received diabetes education in past year at both visits                          | 649 | 336 (52%)   | 84 | 30 (36%)    |
| Diabetes treatment the same at both visits <sup>‡</sup>                          | 649 | 533 (82%)   | 84 | 56 (67%)    |
| Glucose monitoring ≥4 times/day (including continuous monitoring) at both visits | 649 | 348 (54%)   | 84 | 10 (12%)    |
| No severe hypoglycemic events in past 6-12 months at both visits <sup>§</sup>    | 649 | 545 (84%)   | 84 | 81 (96%)    |
| Reported ≥3 HbA1c tests/year at both visits                                      | 649 |             | 84 |             |
| Testing ≥3 times/year at both visits                                             |     | 266 (41%)   |    | 14 (17%)    |
| Testing ≥3 times/year at first follow-up only                                    |     | 128 (20%)   |    | 9 (11%)     |
| Testing ≥3 times/year at second follow-up only                                   |     | 105 (16%)   |    | 16 (19%)    |
| Testing ≥3 times/year at neither visit                                           |     | 150 (23%)   |    | 45 (54%)    |
| HbA1c (%)                                                                        | 638 | 8.9 (1.9)   | 83 | 9.4 (2.8)   |
| HbA1c (mmol/mol)                                                                 | 638 | 73.5 (20.9) | 83 | 79.6 (30.3) |
| Optimal HbA1c (<7% [53 mmol/mol]) at both visits                                 | 626 | 37 (6%)     | 82 | 15 (18%)    |
| Warrants quarterly HbA1c testing at both visits*                                 | 626 | 514 (82%)   | 82 | 48 (59%)    |
| Any microvascular complication                                                   | 649 | 166 (26%)   | 84 | 42 (50%)    |
| Diabetic kidney disease                                                          | 579 | 63 (11%)    | 71 | 20 (28%)    |
| Peripheral neuropathy                                                            | 644 | 53 (8%)     | 83 | 17 (20%)    |
| Diabetic retinopathy                                                             | 626 | 95 (15%)    | 80 | 25 (31%)    |

Data are n (%) unless otherwise noted

\*Per the American Diabetes Association (1,2), quarterly HbA1c testing is warranted when HbA1c >7% (53 mmol/mol) in any individual with type 1 or type 2 diabetes or when age <18 years for those with type 2 diabetes

<sup>‡</sup>Second follow-up asked specifically about a personal *diabetes* doctor

<sup>‡</sup>Type 1: pump (yes/no) consistent across visits; type 2: treatment categories consistent across visits

<sup>§</sup>First follow-up asked about hypoglycemic episodes in past 6 months; second follow-up asked about past 12 months.

## References

1. American Diabetes Association. 6. Glycemic Targets: Standards of Medical Care in Diabetes-2021. *Diabetes Care* 2021;44:S73-S84
2. American Diabetes Association. 13. Children and Adolescents: Standards of Medical Care in Diabetes-2021. *Diabetes Care* 2021;44:S180-S199

**Supplemental Table 2.** Mean difference in HbA1c and odds of any microvascular complication according to HbA1c testing cross-sectionally at the first follow-up visit

|                                                                                                                   | HbA1c %<br>(continuous) |         | Microvascular complication<br>(odds of $\geq 1$ complications) |         |
|-------------------------------------------------------------------------------------------------------------------|-------------------------|---------|----------------------------------------------------------------|---------|
|                                                                                                                   | Beta (95% CI)           | p-value | OR (95% CI)                                                    | p-value |
| <b>A1c testing classified as <math>\geq 3</math> tests/year versus <math>&lt; 3</math> tests/year (reference)</b> |                         |         |                                                                |         |
| <b>Type 1</b>                                                                                                     |                         |         |                                                                |         |
| N (events)                                                                                                        | N=1855                  |         | N=1883 (273 events)                                            |         |
| $\geq 3$ HbA1c tests/year                                                                                         |                         |         |                                                                |         |
| Model 1                                                                                                           | -0.33 (-0.50, -0.16)    | 0.0002  | 0.53 (0.41, 0.69)                                              | <0.0001 |
| Model 2                                                                                                           | -0.32 (-0.50, -0.16)    | 0.0002  | 0.82 (0.62, 1.09)                                              | 0.17    |
| Model 3                                                                                                           | -0.16 (-0.33, 0.01)     | 0.07    | 0.97 (0.72, 1.31)                                              | 0.85    |
| <b>Type 2</b>                                                                                                     |                         |         |                                                                |         |
| N (events)                                                                                                        | N=227                   |         | N=230 (75 events)                                              |         |
| $\geq 3$ HbA1c tests/year                                                                                         |                         |         |                                                                |         |
| Model 1                                                                                                           | 0.60 (-0.24, 1.43)      | 0.16    | 0.69 (0.37, 1.32)                                              | 0.27    |
| Model 2                                                                                                           | 0.56 (-0.32, 1.45)      | 0.21    | 0.75 (0.38, 1.47)                                              | 0.40    |
| Model 3                                                                                                           | -0.12 (-0.97, 0.72)     | 0.77    | 0.69 (0.32, 1.47)                                              | 0.33    |
| <b>A1c testing classified as 0, 1, 2, or <math>\geq 3</math> tests/year</b>                                       |                         |         |                                                                |         |
| <b>Type 1</b>                                                                                                     |                         |         |                                                                |         |
| N (events)                                                                                                        | N=1855                  |         | N=1883 (273 events)                                            |         |
| HbA1c tests (per 1-test increase)                                                                                 |                         |         |                                                                |         |
| Model 1                                                                                                           | -0.28 (-0.38, -0.18)    | <0.0001 | 0.69 (0.60, 0.80)                                              | <0.0001 |
| Model 2                                                                                                           | -0.30 (-0.40, -0.19)    | <0.0001 | 0.89 (0.76, 1.04)                                              | 0.13    |
| Model 3                                                                                                           | -0.18 (-0.28, -0.07)    | 0.0009  | 1.01 (0.85, 1.19)                                              | 0.95    |
| <b>Type 2</b>                                                                                                     |                         |         |                                                                |         |
| N (events)                                                                                                        | N=227                   |         | N=230 (75 events)                                              |         |
| HbA1c tests (per 1-test increase)                                                                                 |                         |         |                                                                |         |
| Model 1                                                                                                           | 0.26 (-0.07, 0.59)      | 0.13    | 0.86 (0.67, 1.10)                                              | 0.24    |
| Model 2                                                                                                           | 0.25 (-0.11, 0.60)      | 0.17    | 0.88 (0.68, 1.14)                                              | 0.34    |
| Model 3                                                                                                           | -0.13 (-0.50, 0.24)     | 0.49    | 0.81 (0.58, 1.12)                                              | 0.20    |

Model 1 is unadjusted.

Model 2 adjusts for age at diagnosis, gender, race/ethnicity, duration of diabetes, and clinical site.

Model 3 adjusts for Model 2 variables, receipt of diabetes education, frequency of glucose self-monitoring, and additional covariates informed by stepwise variable selection via logistic regression model with  $\geq 3$  tests/year at the first follow-up visit as the outcome (type 1: household income at first visit, diabetes treatment regimen, type of diabetes provider, have a personal doctor, problems with cost, continuous insurance for the past 12 months; type 2: diabetes treatment regimen, type of diabetes provider).

**Supplemental Table 3.** Mean difference in HbA1c and odds of any microvascular complication at the second SEARCH follow-up visit according to HbA1c testing longitudinally at the first and second follow-up visits

|                                                                                                                   | HbA1c %<br>(continuous) |         | Microvascular complication<br>(odds of $\geq 1$ complications) |         |
|-------------------------------------------------------------------------------------------------------------------|-------------------------|---------|----------------------------------------------------------------|---------|
|                                                                                                                   | Beta (95% CI)           | p-value | OR (95% CI)                                                    | p-value |
| <b>A1c testing classified as <math>\geq 3</math> tests/year versus <math>&lt; 3</math> tests/year (reference)</b> |                         |         |                                                                |         |
| <b>Type 1</b>                                                                                                     |                         |         |                                                                |         |
| N (events)                                                                                                        | N=638                   |         | N=649 (166 events)                                             |         |
| $\geq 3$ HbA1c tests/year                                                                                         |                         |         |                                                                |         |
| Model 1*                                                                                                          | -0.17 (-0.48, 0.13)     | 0.26    | 0.51 (0.35, 0.75)                                              | 0.0006  |
| Model 2†                                                                                                          | -0.36 (-0.65, -0.06)    | 0.02    | 0.64 (0.43, 0.97)                                              | 0.03    |
| Model 3‡                                                                                                          | -0.17 (-0.46, 0.13)     | 0.27    | 0.70 (0.46, 1.07)                                              | 0.10    |
| <b>Type 2</b>                                                                                                     |                         |         |                                                                |         |
| N (events)                                                                                                        | n=83                    |         | n=84 (42 events)                                               |         |
| $\geq 3$ HbA1c tests/year                                                                                         |                         |         |                                                                |         |
| Model 1                                                                                                           | -0.20 (-1.83, 1.43)     | 0.81    | 1.41 (0.44, 4.49)                                              | 0.56    |
| Model 2*                                                                                                          | -0.27 (-2.00, 1.47)     | 0.76    | --                                                             | --      |
| Model 3*                                                                                                          | -0.17 (-2.06, 1.753)    | 0.86    | --                                                             | --      |
| <b>A1c testing classified as 0, 1, 2, or <math>\geq 3</math> tests/year</b>                                       |                         |         |                                                                |         |
| <b>Type 1</b>                                                                                                     |                         |         |                                                                |         |
| N (events)                                                                                                        | N=638                   |         | N=649 (166 events)                                             |         |
| HbA1c tests (per 1-test increase)                                                                                 |                         |         |                                                                |         |
| Model 1                                                                                                           | -0.27 (-0.51, -0.04)    | 0.02    | 0.56 (0.43, 0.74)                                              | <0.0001 |
| Model 2                                                                                                           | -0.44 (-0.67, -0.22)    | 0.0001  | 0.63 (0.47, 0.85)                                              | 0.002   |
| Model 3                                                                                                           | -0.29 (-0.52, -0.06)    | 0.01    | 0.67 (0.49, 0.92)                                              | 0.01    |
| <b>Type 2</b>                                                                                                     |                         |         |                                                                |         |
| N (events)                                                                                                        | n=83                    |         | n=84 (42 events)                                               |         |
| HbA1c tests (per 1-test increase)                                                                                 |                         |         |                                                                |         |
| Model 1                                                                                                           | -0.34 (-1.04, 0.36)     | 0.33    | 0.92 (0.56, 1.52)                                              | 0.75    |
| Model 2*                                                                                                          | -0.46 (-1.20, 0.28)     | 0.22    | --                                                             | --      |
| Model 3*                                                                                                          | -0.45 (-1.29, 0.39)     | 0.29    | --                                                             | --      |

Model 1 is unadjusted.

Model 2 adjusts for age at diagnosis, gender, race/ethnicity, duration of diabetes, and clinical site.

Model 3 adjusts for Model 2 variables, receipt of diabetes education, frequency of glucose self-monitoring, and additional covariates informed by stepwise variable selection via logistic regression model with  $\geq 3$  tests/year at both follow-up visits as the outcome (type 1: household income at first visit, have a personal doctor, continuous insurance for the past 12 months; type 2: type of diabetes provider).

\*Models 2 and 3 did not converge for type 2 diabetes.

**Supplemental Figure 1.** Flow diagram with analytic sample sizes.

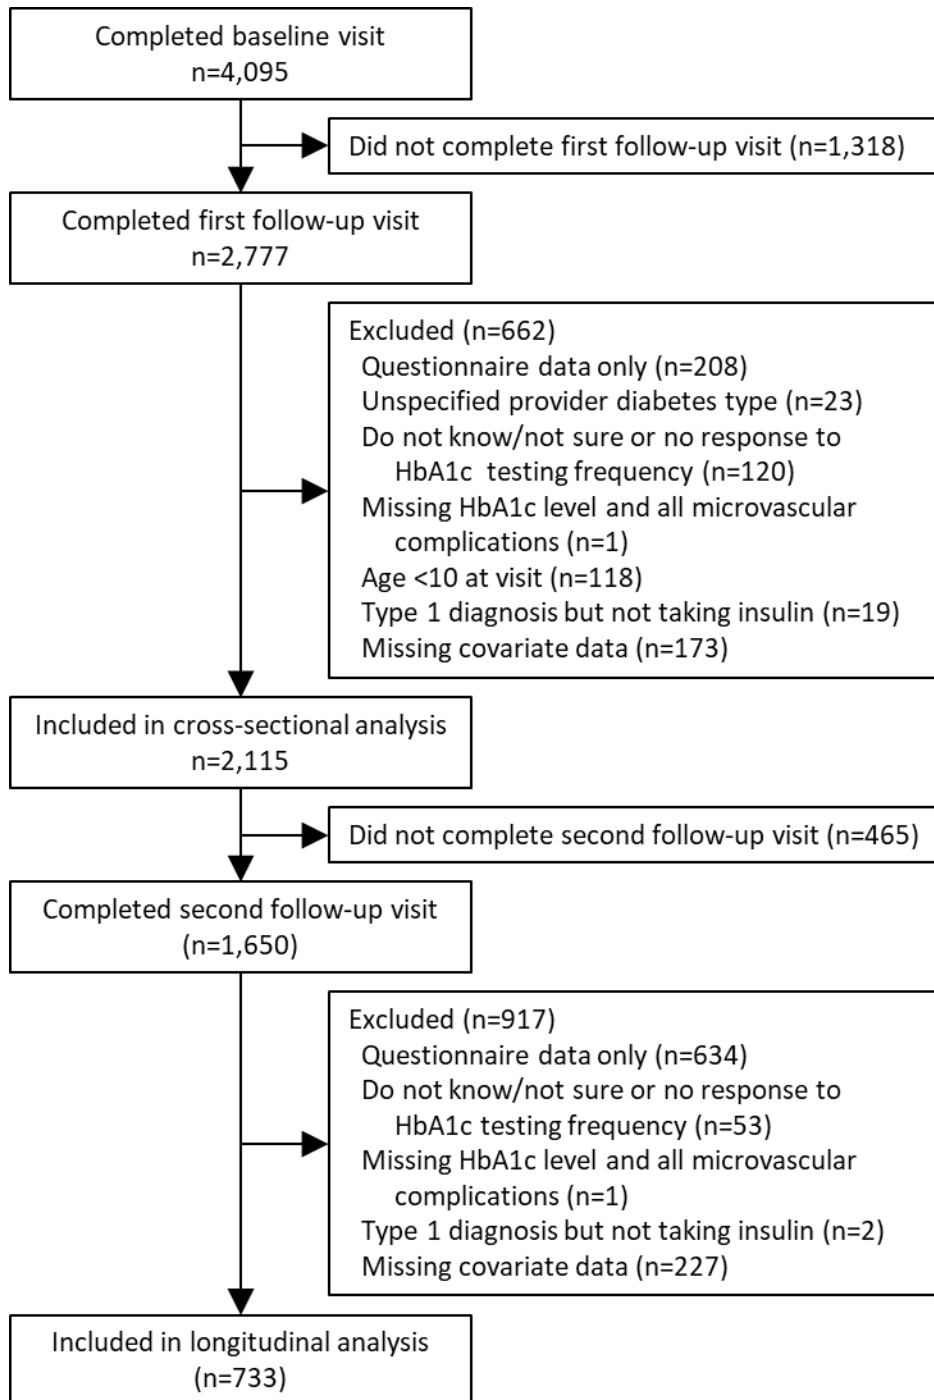

**Supplemental Figure 2.** Mean HbA1c (95% CI) for those reporting <3 tests/year (gray bars) or ≥3 tests/year (white bars) cross-sectionally at the first follow-up visit (A) or longitudinally at the first and second follow-up visits (B).

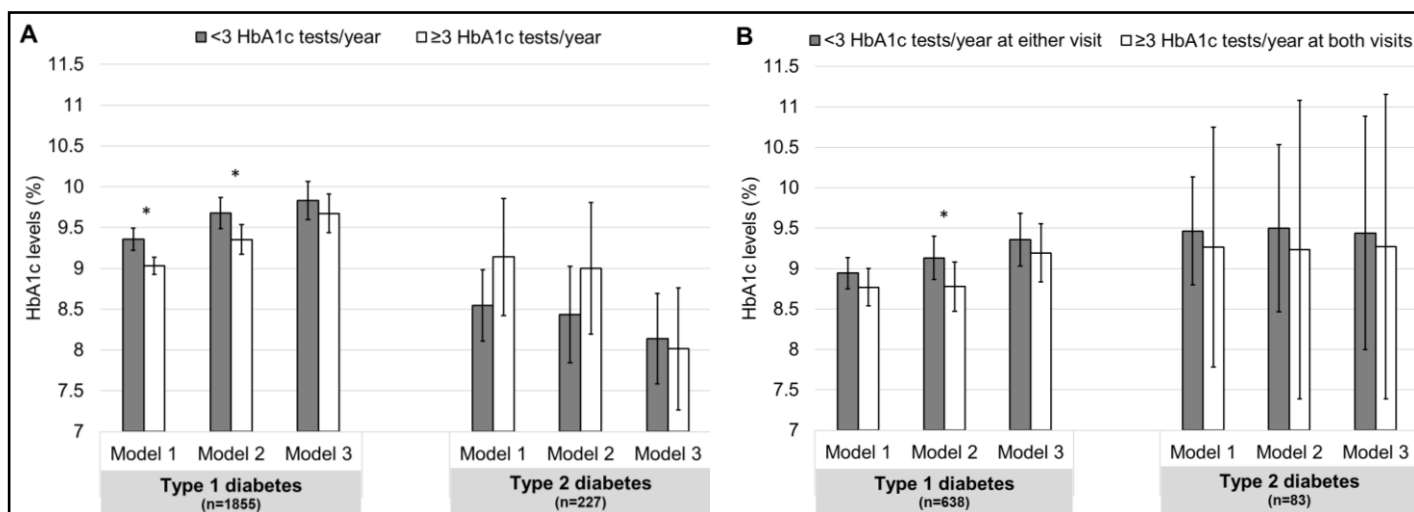

\*p<0.05 for comparison between HbA1c testing frequency groups.

Model 1 is unadjusted.

Model 2 adjusts for age at diagnosis, gender, race/ethnicity, duration of diabetes, and clinical site.

Model 3 adjusts for Model 2 variables, receipt of diabetes education, frequency of glucose self-monitoring, and additional covariates informed by stepwise variable selection via logistic regression model with ≥3 tests/year as the outcome (type 1: household income at first visit, diabetes treatment regimen, type of diabetes provider, have a personal doctor, problems with cost, continuous insurance for the past 12 months; type 2: diabetes treatment regimen, type of diabetes provider).
